# Supplementary material for: Synthesis of a novel polyester building block from pentoses by tin-containing silicates
Source: Royal Society of Chemistry journal article supplement (doi:10.1039/c6ra26708d), 2017-01-01
Supplement: c6ra26708d1.pdf [file c6ra26708d1.pdf]

## Supporting Information

### Synthesis of a novel polyester building block from pentoses by tin-containing silicates

S. G. Elliot, C. Andersen, S. Tolborg, S. Meier, I. Sádaba, A. E. Daugaard, E. Taarning

#### Table of Contents

|                                                         |   |
|---------------------------------------------------------|---|
| Polymerization of Ethyl 6-Hydroxyhexanoate (E6-HH)..... | 2 |
| Figure S1. Polymerization Results .....                 | 2 |
| Figures.....                                            | 3 |
| Figure S2. XRD Diffractograms .....                     | 3 |
| Figure S3. Low Angle XRD Diffractograms .....           | 4 |
| Figure S4. DPM GC-MS Spectrum .....                     | 4 |
| Figure S5. DPM NMR Spectra.....                         | 5 |
| Figure S6. FT-IR of poly(E6-HH-co-DPM).....             | 5 |
| Figure S7. DSC of poly(E6-HH-co-DPM) .....              | 6 |
| Figure S8. <sup>1</sup> H-NMR of Polymer II.....        | 7 |
| Tables.....                                             | 8 |
| Table S1 .....                                          | 8 |
| Table S2 .....                                          | 8 |
| Table S3 .....                                          | 8 |
| Table S4 .....                                          | 9 |
| Table S5 .....                                          | 9 |
| Table S6 .....                                          | 9 |

## Polymerization of Ethyl 6-Hydroxyhexanoate (E6-HH)

Ethyl 6-hydroxyhexanoate (E6-HH) (2.0 g, 12 mmol) and CAL-B (NZ435, 0.20 g) was transferred to a Schlenk tube. The suspension was then immersed in an oil bath at 80 °C under stirring and *va cuum* (200 mbar) for 18 h and terminated by cooling in a dry ice bath. The product was dissolved in THF and enzyme particles were filtered off by suction filtration (particle retention 5-13  $\mu\text{m}$ ). The residue was washed with THF several times. The filtrate was evaporated *in vacuo*, re-dissolved in THF and precipitated in cold methanol. The precipitate was filtered and the residue were dried under *va cuum* at room temperature overnight yielding 0.40 g polyester as a white solid. The procedure was repeated for 50, 60 and 70 °C respectively (results in Table S6) showing a linear increase in molecular weight as seen in the figure below. The yield of the polymerization was 20% after precipitation.

SEC:  $M_n = 5421 \text{ g mol}^{-1}$ ,  $M_w = 6878 \text{ g mol}^{-1}$ , PDI = 1.27. DSC:  $T_m = 51.82^\circ\text{C}$ . IR:  $\tilde{\nu} / \text{cm}^{-1} = 3425, 2944, 2864, 1721, 1167, 1043$ .  $^1\text{H NMR}$  (300 MHz,  $\text{CDCl}_3$ )  $\delta$  4.09 (m, 0.02H), 4.03 (t,  $J = 6.7 \text{ Hz}$ , 1H), 3.61 (t,  $J = 6.4 \text{ Hz}$ , 0.09H), 2.27 (t,  $J = 7.5 \text{ Hz}$ , 1H), 1.61 (m, 2H), 1.35 (qv,  $J = 8.3 \text{ Hz}$ , 1H), 1.22 (t,  $J = 7.1 \text{ Hz}$ , 0.08H).  $^{13}\text{C NMR}$  (75 MHz,  $\text{CDCl}_3$ )  $\delta$  173.5, 64.0, 62.5, 60.2, 34.0, 28.3, 25.4, 24.5, 14.2.

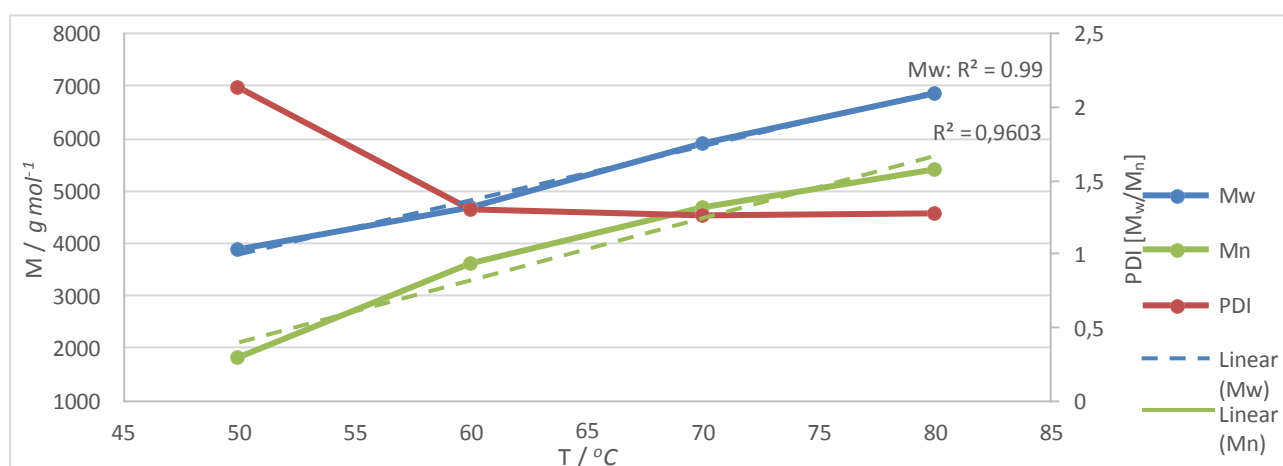

Figure S1. Polymerization Results. Influence of temperature on Mn, Mw and PDI for enzymatic polymerization of E6-HH.

## Figures

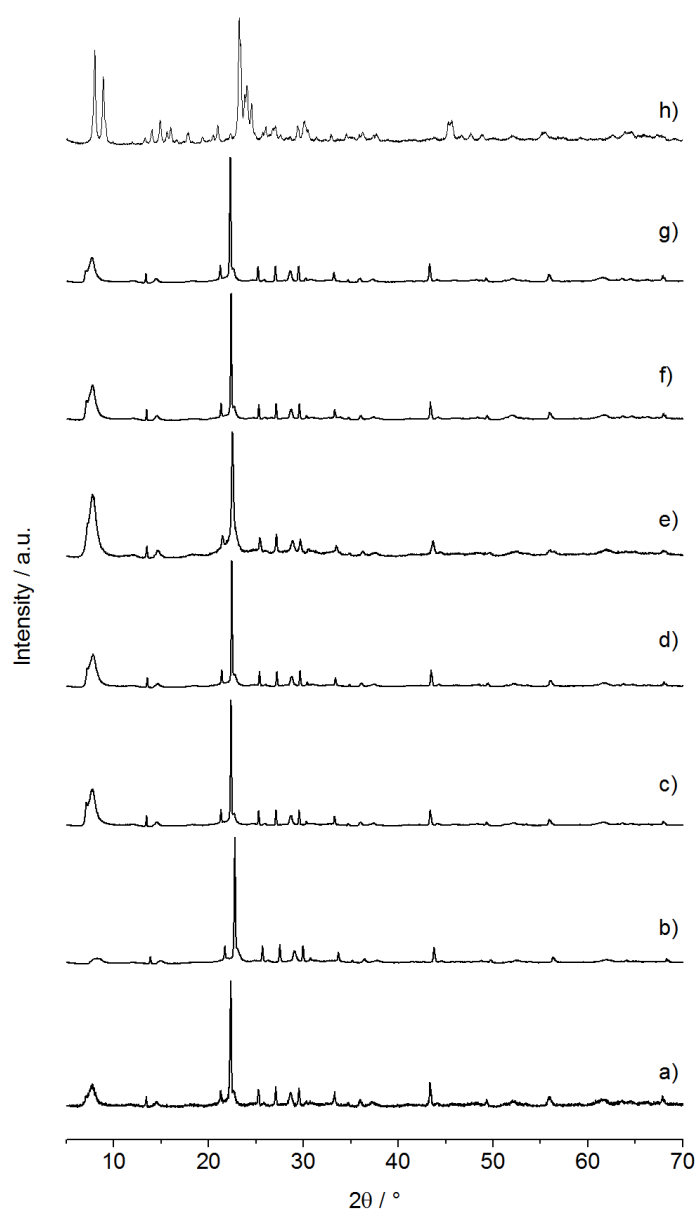

**Figure S2. XRD Diff racto grams.** XRD diffractograms of a) Sn-Beta (HT, Si/Sn = 150), b) Zr-Beta (HT, Si/Zr = 150), c) Ti-Beta (HT, Si/Ti = 150), d) Al-Beta (HT, Si/Al = 150), e) Sn-B eta (PT, Si/Sn = 125), f) SnO<sub>2</sub>-Beta (HT, Si/Sn = 200), g) Si-Beta (HT), and h) Sn-MFI (OH<sup>-</sup>, Si/Sn = 100)

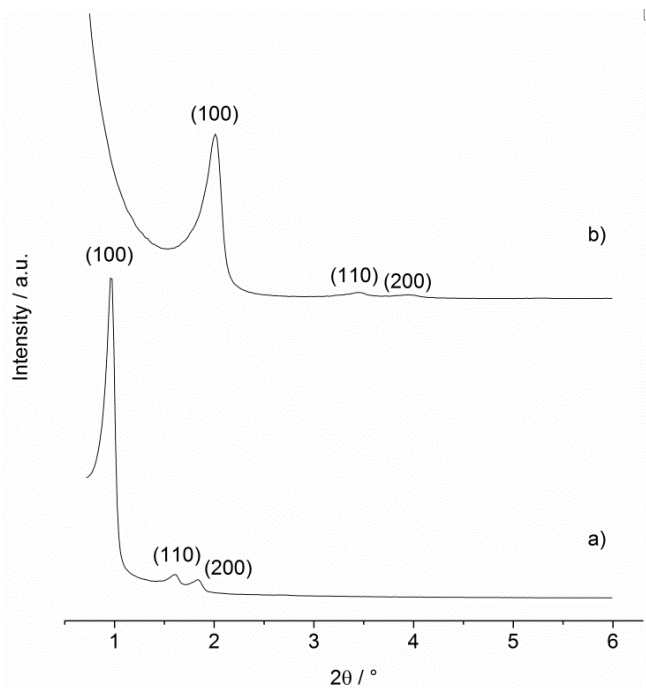

**Figure S3. Low Angle XRD Diffractograms .** Low angle XRD diffractograms of a) Sn-MCM-41 (Si/Sn = 200) and b) Sn-SBA-15 (Si/Sn = 200).

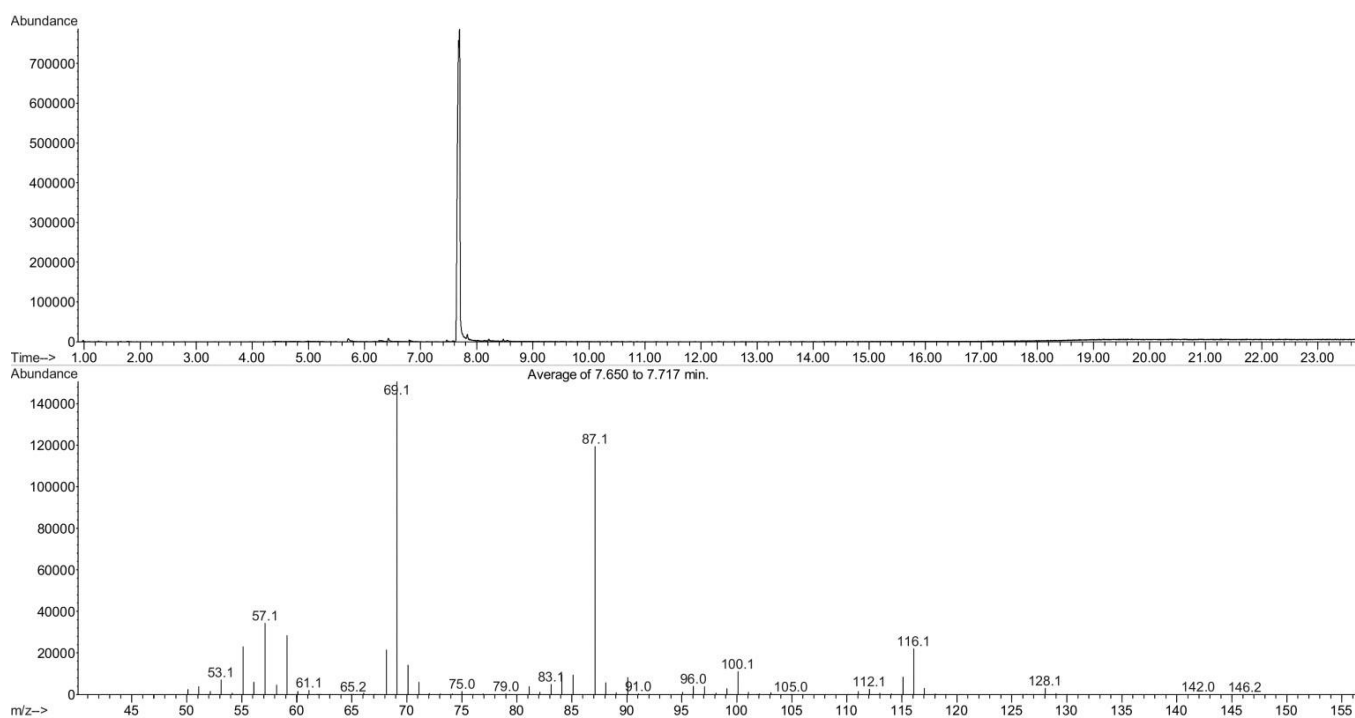

**Figure S4. DPM GC-MS Spectrum m.** GC-MS spectrum of purified trans-2,5-dihydroxy-3-pentenoic acid methyl ester (DPM), analysed on an Agilent 6890 with a Phenomenex Zebron ZB-5 column.

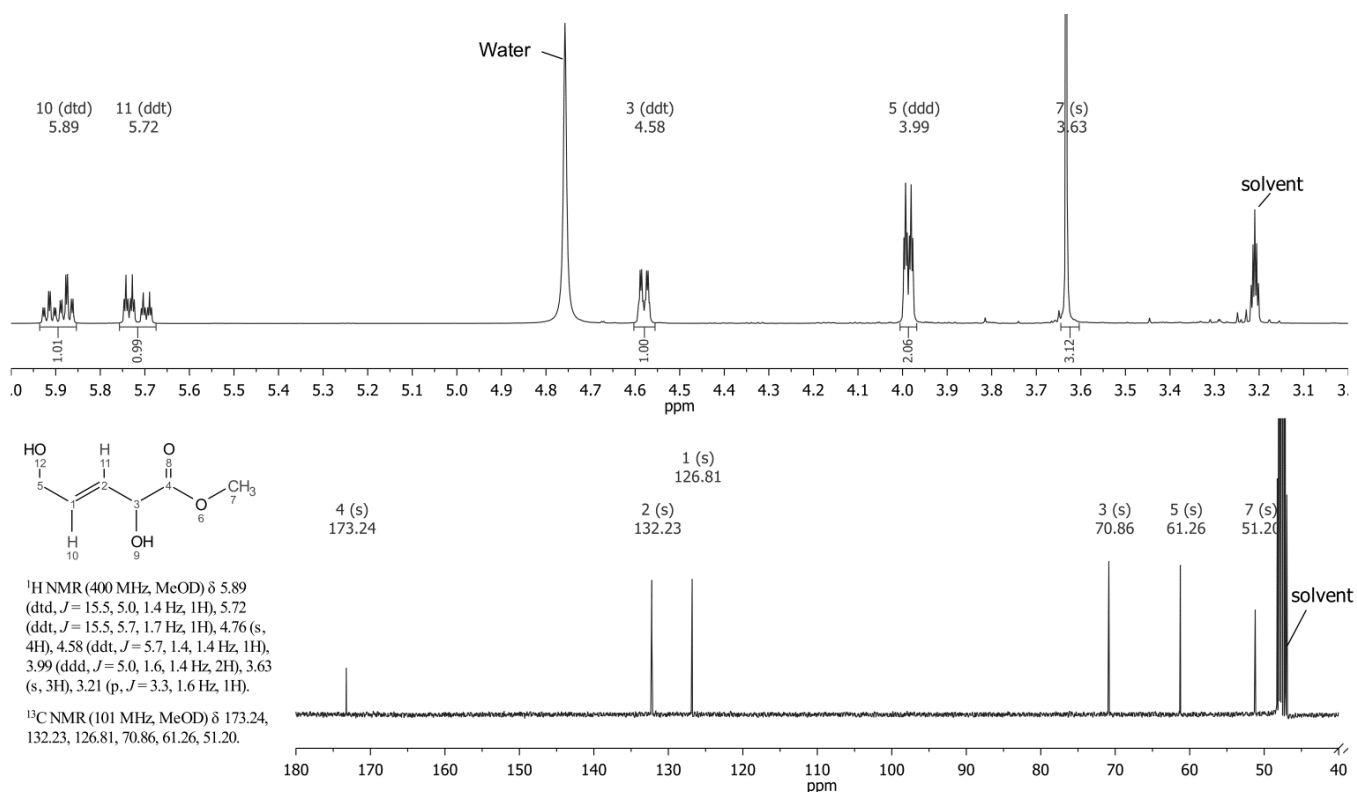

**Figure S5. DPM NMR Spectra.** Spectra and assignment of  $^1\text{H}$  NMR (400 MHz) and  $^{13}\text{C}$  NMR (100 MHz) signals in trans-2,5-dihydroxy-3-pentenoic acid methyl ester (DPM). NMR spectra were recorded on a Bruker Ascend 400 spectrometer,  $^1\text{H}$  NMR was recorded at 400 MHz and  $^{13}\text{C}$  NMR was recorded at 100 MHz. The chemical shifts are given in ppm relative to the residual solvent signals and the chemical shifts are reported downfield to TMS.

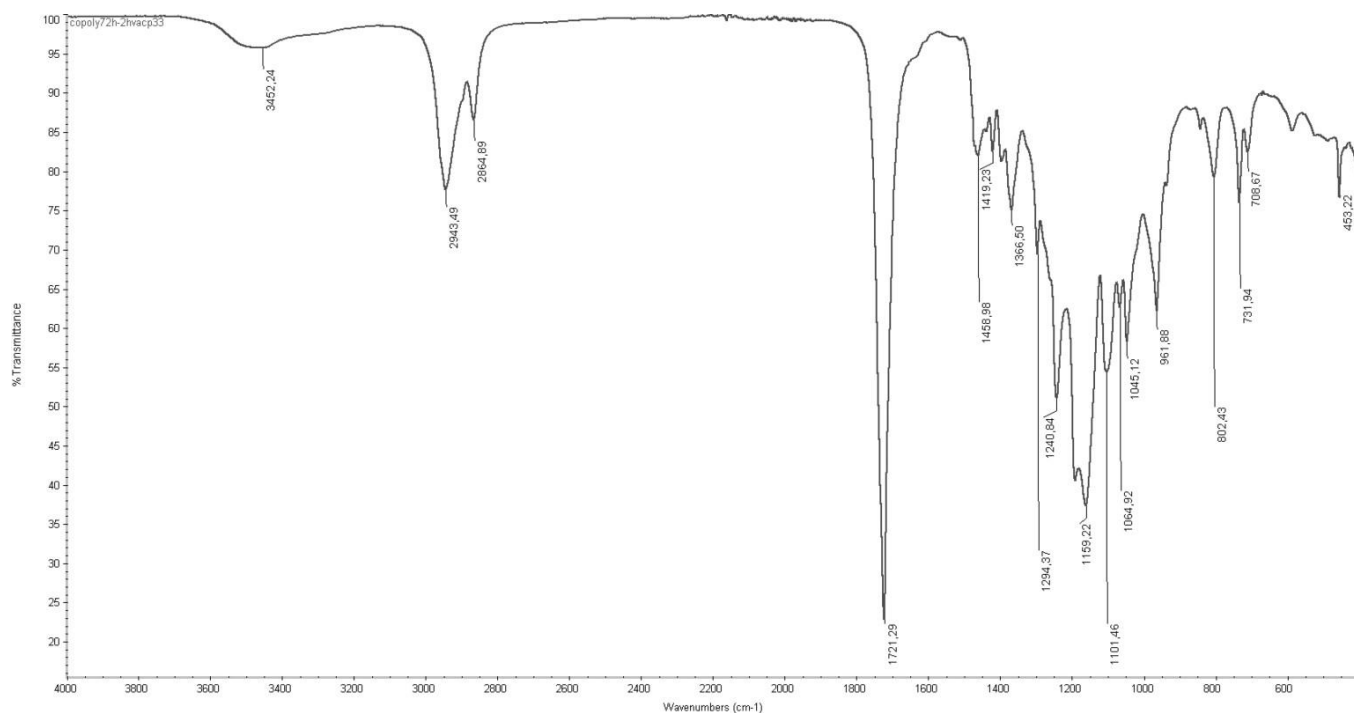

**Figure S6. FT-IR of poly(E6-HH-co-DPM).** FT-IR spectrum of poly(E6-HH-co-DPM) showing a broad signal at 3496  $\text{cm}^{-1}$  arising from the O-H stretch as well as a characteristic C=O stretch at 1721  $\text{cm}^{-1}$  and C-O stretch at 1159  $\text{cm}^{-1}$  and 1045  $\text{cm}^{-1}$  from the ester functionality. A weak signal from the C=C stretch is visible on the shoulder of the C=O stretch and a strong C=C out-of-plane bend signal is visible at 961  $\text{cm}^{-1}$ .

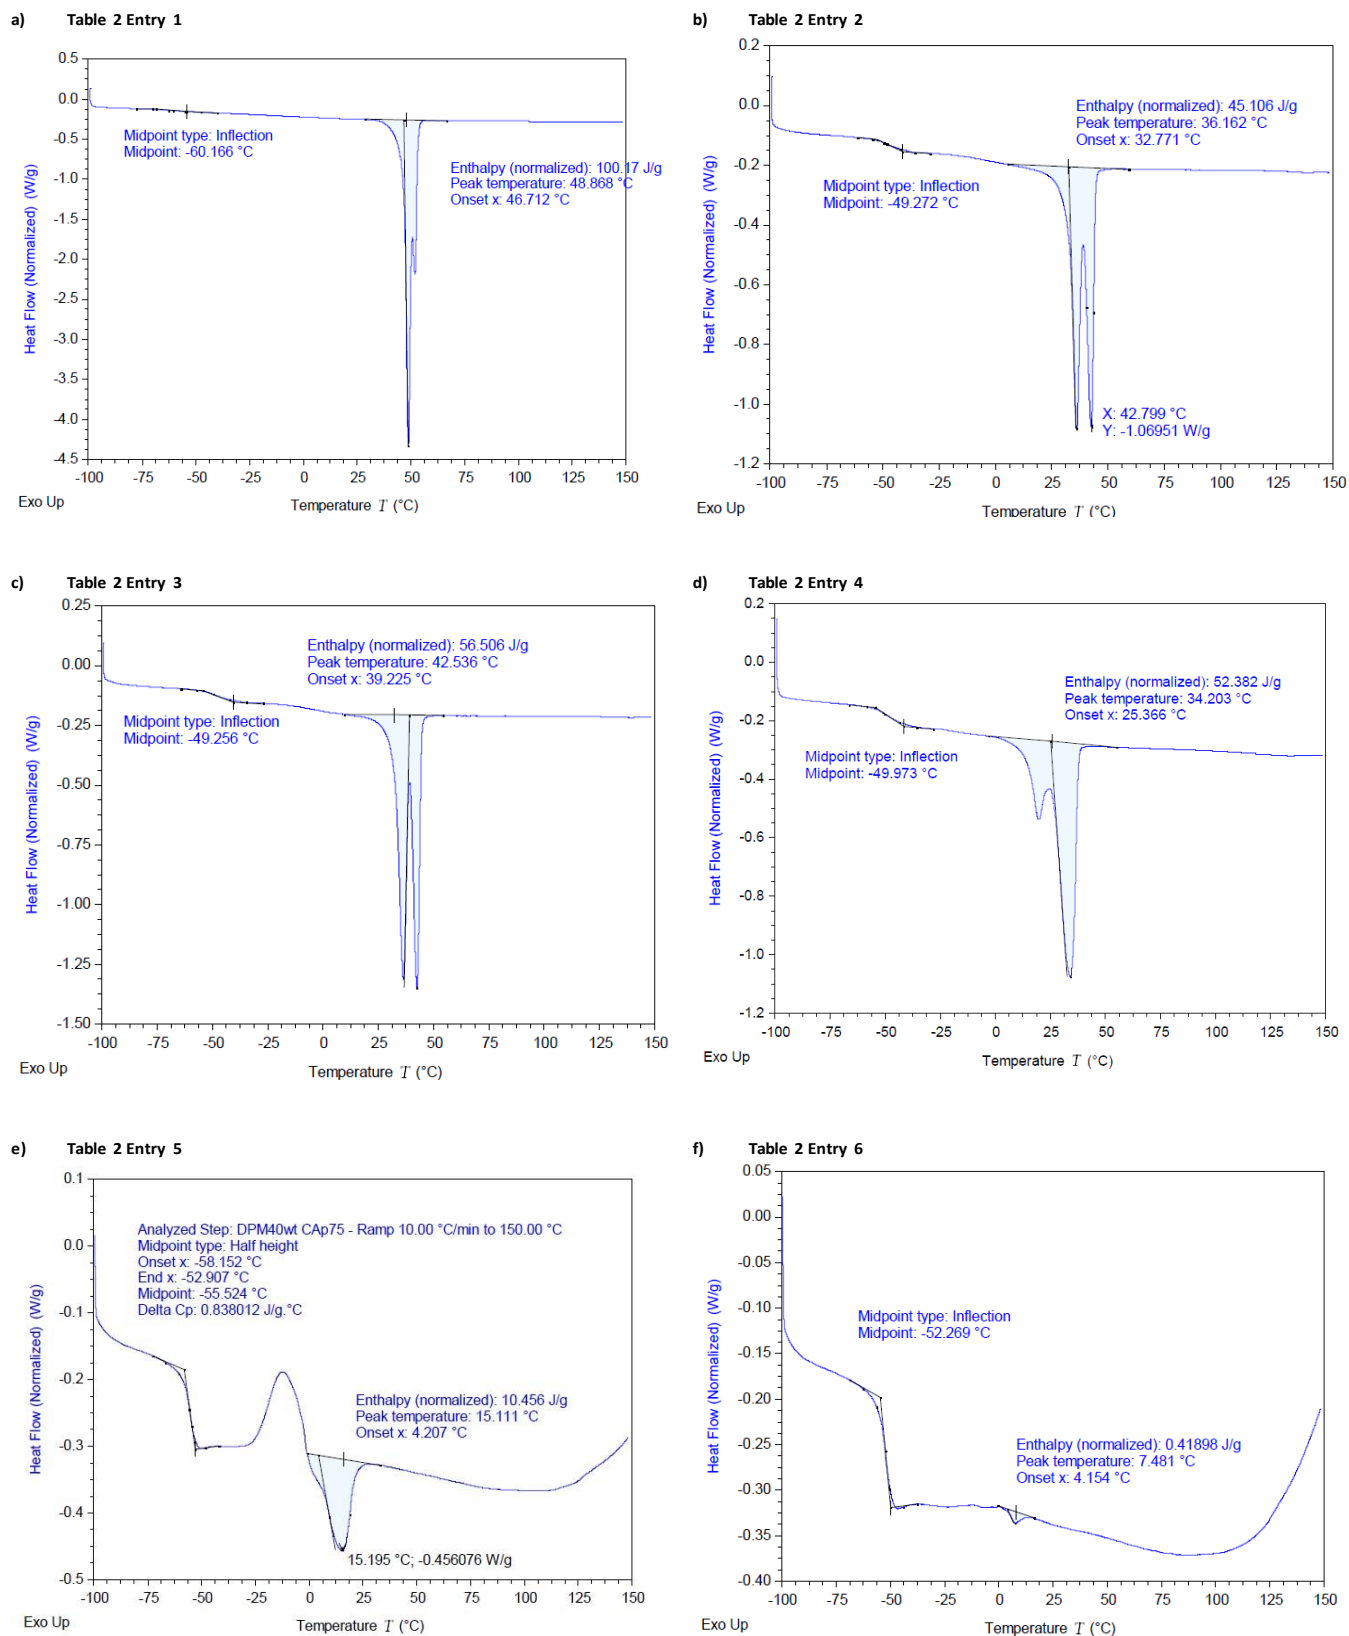

**Figure S7. DSC of poly(E6-HH-co-DPM).** DSC spectra of different poly(E6-HH-co-DPM) synthesis. a) table 2 entry 1, 18 hours reaction time, 100% E6 -HH. b) table 2 entry 2, 18 hours reaction time, 0.22 DPM/E6-HH. c) table 2 entry 3, 42 hours reaction time, 0.22 DPM/E6 -HH. d) table 2 entry 4, 72 hours reaction time, 0.22 DPM/E6-HH. e) table 2 entry 5, 72 hours reaction time, 0.44 DPM/E6-HH. f) table 2 entry 6, 72 hours reaction time, 0.66 DPM/E6 -HH.

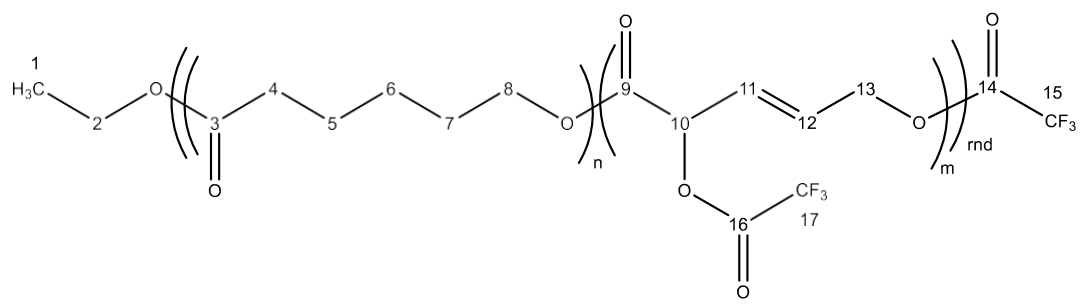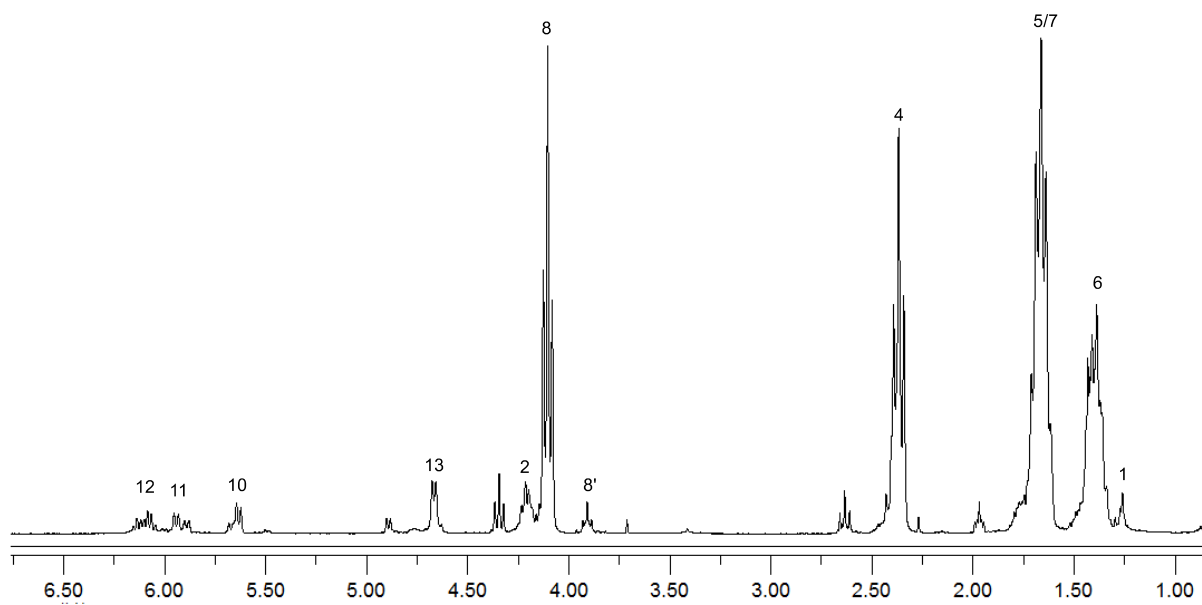

Figure S8.  $^1\text{H-NMR}$  of Polymer II.  $^1\text{H}$  NMR assignment of TFA modified poly(E6-HH-co-DPM).

## Tables

**Table S1.** Physical properties of the various catalysts used in the study measured using N<sub>2</sub>-adsorption/desorption and from XRD diffraction.

| Entry | Catalyst                     | Elemental Analysis | X-ray diffraction | N <sub>2</sub> -adsorption |                                       |                    |                                       |
|-------|------------------------------|--------------------|-------------------|----------------------------|---------------------------------------|--------------------|---------------------------------------|
|       |                              |                    |                   | S <sub>BET</sub>           | S <sub>micropore</sub> <sup>[a]</sup> | V <sub>total</sub> | V <sub>micropore</sub> <sup>[a]</sup> |
|       |                              |                    |                   |                            |                                       |                    |                                       |
| 1     | Sn-Beta (HT, 150)            | 186                | *BEA              | 486                        | 362                                   | 0.33               | 0.19                                  |
| 2     | Sn-Beta (PT, 125)            | 113                | *BEA              | 557                        | 373                                   | 0.37               | 0.19                                  |
| 3     | Sn-MFI (100)                 | 82                 | MFI               | 404                        | 273                                   | 0.25               | 0.14                                  |
| 4     | Sn-MCM-41 (200)              | 252                | -                 | 962                        | -                                     | 1.00               | -                                     |
| 5     | Sn-SBA-15 (200)              | 271                | -                 | 918                        | 111                                   | 1.09               | 0.06                                  |
| 6     | SnO <sub>2</sub> -Beta (200) | 303                | *BEA              | 457                        | 365                                   | 0.27               | 0.19                                  |
| 7     | Ti-Beta (HT, 150)            | 245                | *BEA              | 460                        | 372                                   | 0.27               | 0.19                                  |
| 8     | Zr-Beta (HT, 150)            | 167                | *BEA              | 470                        | 374                                   | 0.27               | 0.19                                  |
| 9     | Al-Beta (HT, 150)            | 142                | *BEA              | 472                        | 366                                   | 0.27               | 0.19                                  |
| 10    | Si-Beta                      | -                  | *BEA              | 465                        | 378                                   | 0.27               | 0.20                                  |

n.a. = not available

[a] Determined using the t-plot method.

**Table S2.** Conversion of xylose using a variety of catalysts.

| Entry | Catalyst                              | XYL      | MG       | Retro-Aldol |          |          |           |      | Dehydration |         |                         |                    |     |       |
|-------|---------------------------------------|----------|----------|-------------|----------|----------|-----------|------|-------------|---------|-------------------------|--------------------|-----|-------|
|       |                                       |          |          | %           | GA-DMA   | ML       | MVG       | MMHB | Total       | DPL     | TPM/DMPM <sup>[a]</sup> | FUR <sup>[b]</sup> | DPM | Total |
|       |                                       |          |          |             |          |          |           |      |             |         |                         |                    |     |       |
| 1     | Sn-Beta (HT)                          | n.d.     | 4 (1)    | 1.81 (7)    | 14 (1)   | 2.1 (6)  | 0.6 (3)   | 19   | 10.3 (5)    | 13 (1)  | 11 (1)                  | 33 (3)             | 68  |       |
| 2     | Sn-Beta (PT)                          | n.d.     | 23 (1)   | 3.18 (2)    | 10.8 (3) | 0.63 (4) | 0.8 (8)   | 15   | 5.7 (9)     | 9 (1)   | 17.4 (6)                | 23 (1)             | 55  |       |
| 3     | Sn-MFI                                | 0.9 (9)  | 30 (4)   | 6.0 (2)     | 16.9 (4) | 1.29 (6) | 0.36 (3)  | 24   | 3.0 (2)     | 3.0 (2) | 10.1 (5)                | 11 (1)             | 27  |       |
| 4     | Sn-MCM-41                             | n.d.     | 23 (5)   | 4.0 (8)     | 12.5 (7) | 0.40 (6) | 0.8 (2)   | 18   | 6 (1)       | 14 (1)  | 20.5 (7)                | 16 (1)             | 57  |       |
| 5     | Sn-SBA-15                             | 0.3 (2)  | 32 (6)   | 6.0 (1)     | 10.9 (3) | 0.30 (2) | 0.6 (3)   | 18   | 3.3 (1)     | 9.5 (3) | 17.7 (8)                | 12 (1)             | 42  |       |
| 6     | SnO <sub>2</sub> -Beta <sup>[c]</sup> | 53 (5)   | 42 (5)   | 2.3 (2)     | 0.45 (4) | 0.39 (4) | 0.1 (1)   | 3    | 1.281 (3)   | 2.3 (6) | 1.4 (2)                 | 0.42 (2)           | 6   |       |
| 7     | Ti-Beta                               | 0.46 (4) | 48       | 7.4 (1)     | 11.2 (8) | 2.81 (5) | 0.34 (1)  | 22   | 3.8 (2)     | 6.7 (2) | 4.8 (3)                 | 0.83 (2)           | 16  |       |
| 8     | Zr-Beta                               | 0.3 (2)  | 39       | 12.0 (2)    | 10.3 (1) | 2.0 (1)  | 0.54 (2)  | 25   | 2.5 (3)     | 2.1 (1) | 3.9 (3)                 | 0.65 (7)           | 9   |       |
| 9     | Al-Beta                               | 6 (1)    | 81.9 (5) | n.d.        | n.d.     | n.d.     | n.d.      | 0    | n.d.        | n.d.    | 1.2 (2)                 | n.d.               | 1   |       |
| 10    | Si-Beta                               | 13       | 42       | 5.1 (2)     | 2.01 (6) | 0.37 (6) | 0.321 (4) | 8    | 1.61 (5)    | 3.1 (3) | 3.4 (6)                 | 0.2 (2)            | 8   |       |
| 11    | Blank                                 | 87.7 (6) | 6.2 (3)  | 0.28 (7)    | 0.2 (3)  | 0.6 (1)  | 0.1 (1)   | 1    | n.d.        | n.d.    | 0.3 (2)                 | n.d.               | 1   |       |

Reactions were performed in triplicate and employed the standard reaction conditions: 360 mg xylose (8.3 wt%), 4 g methanol, 180 mg catalyst, 2 h, 160 °C, 600 rpm stirring. Standard deviations of the last digit are given in parenthesis. Compound abbreviations: 2,5-dihydroxy-4-methoxy-pentanoic acid methyl ester (DMPM), 3-deoxypentanolactone (DPL), *trans*-2,5-dihydroxy-3-pentenoic acid methyl ester (DPM), furanics (FUR), glycolaldehyde dimethyl acetal (GA-DMA), methyl glycosides (MG), methyl lactate (ML), methyl 4-methoxy-2-hydroxybutanoate (MMHB), methyl vinyl glycolate (MVG), 2,4,5-trihydroxy-3-pentanoic acid methyl ester (TPM) and xylose (XYL). n.d. = not detected.

[a] Combined yields (carbon%) of 2,4,5-trihydroxy-3-pentanoic acid methyl ester and 2,5-dihydroxy-4-methoxy-pentanoic acid methyl ester.

[b] Combined yields (carbon%) of furfural and furfural dimethyl acetal.

[c] Dispersed SnO<sub>2</sub> nanoparticles on Si-Beta.

**Table S3.** Reaction yields from the conversion of pentoses with varying substrates and concentrations.

| Entry | Substrate | Substrate | PENT     | MG      | Retro-Aldol |        |         |         |      | Dehydration |          |                         |                    |     |       |
|-------|-----------|-----------|----------|---------|-------------|--------|---------|---------|------|-------------|----------|-------------------------|--------------------|-----|-------|
|       |           |           |          |         | %           | GA-DMA | ML      | MVG     | MMHB | Total       | DPL      | TPM/DMPM <sup>[a]</sup> | FUR <sup>[b]</sup> | DPM | Total |
|       |           |           |          |         |             |        |         |         |      |             |          |                         |                    |     |       |
| 1     | Ribose    | 8.3       | n.d.     | 3 (2)   | 2.0 (1)     | 12 (2) | 2.0 (7) | 0.5 (2) | 17   | 10.37 (3)   | 10.1 (3) | 12 (2)                  | 30 (2)             | 63  |       |
| 2     | Lyxose    | 8.3       | n.d.     | 2.6 (6) | 2.1 (1)     | 15 (3) | 2 (1)   | 0.5 (3) | 20   | 11.6 (2)    | 12.6 (1) | 11 (3)                  | 31 (2)             | 66  |       |
| 3     | Xylose    | 8.3       | n.d.     | 4 (1)   | 1.81 (7)    | 14 (1) | 2.1 (6) | 0.6 (3) | 19   | 10.3 (5)    | 13 (1)   | 11 (1)                  | 33 (3)             | 68  |       |
| 4     | Xylose    | 15        | 0.06 (9) | 6 (1)   | 0.3 (1)     | 14 (1) | 1.9 (4) | 0.3 (1) | 17   | 11.37 (4)   | 13 (1)   | 8.7 (9)                 | 34 (4)             | 68  |       |
| 5     | Xylose    | 23        | n.d.     | 6 (1)   | 2 (2)       | 13 (1) | 1.7 (4) | 0.3 (2) | 17   | 11.1 (5)    | 13 (2)   | 11 (2)                  | 32 (2)             | 67  |       |

Reactions were performed in triplicate and employed the reaction conditions: 180 -1200 mg pentose (4.3-23 wt%), 4 g methanol, 180 mg Sn-Beta (HT, 150), 2 h, 160 °C, 600 rpm stirring. Standard deviations of the last digit are given in parenthesis. Compound abbreviations: 2,5-dihydroxy-4-methoxy-pentanoic acid methyl ester (DMPM), 3-deoxypentanolactone (DPL), *trans*-2,5-dihydroxy-3-pentenoic acid methyl ester (DPM), furanics (FUR), glycolaldehyde dimethyl acetal (GA-DMA), methyl glycosides (MG), methyl lactate (ML), methyl 4-methoxy-2-hydroxybutanoate (MMHB), methyl vinyl glycolate (MVG), reactant pentose (PENT) and 2,4,5-trihydroxy-3-pentanoic acid methyl ester (TPM). n.d. = not detected.

[a] Combined yields (carbon%) of 2,4,5-trihydroxy-3-pentanoic acid methyl ester and 2,5-dihydroxy-4-methoxy-pentanoic acid methyl ester.

[b] Combined yields (carbon%) of furfural and furfural dimethyl acetal.



**Table S4.** Reaction yields from the conversion of xylose, varying catalyst to substrate ratio and temperature.

| Entry | Catalyst/<br>Substrate | Temp.<br>°C | XYL<br>% | MG       | Retro-Aldol |          |          |         |       | Dehydration |                         |                         |        |       |
|-------|------------------------|-------------|----------|----------|-------------|----------|----------|---------|-------|-------------|-------------------------|-------------------------|--------|-------|
|       |                        |             |          |          | GA-DMA      | ML       | MVG<br>% | MMHB    | Total | DPL         | TPM/DMPM <sup>[a]</sup> | FUR <sup>[b]</sup><br>% | DPM    | Total |
| 1     | 0.00 <sup>[c]</sup>    | 160         | 87.7 (6) | 6.2 (3)  | 0.28 (7)    | 0.2 (3)  | 0.6 (1)  | 0.1 (1) | 1     | n.d.        | n.d.                    | 0.3 (2)                 | n.d.   | 1     |
| 2     | 0.125                  | 160         | n.d.     | 3.8 (3)  | 3 (2)       | 23 (1)   | 4.3 (2)  | 1.0 (6) | 32    | 9.0 (5)     | 11.19 (6)               | 14.3 (4)                | 19 (3) | 53    |
| 3     | 0.25                   | 160         | n.d.     | 3.7 (1)  | 2.5 (9)     | 21 (2)   | 3 (1)    | 0.8 (5) | 28    | 8.8 (5)     | 13 (1)                  | 11 (1)                  | 28 (3) | 60    |
| 4     | 0.50                   | 160         | n.d.     | 4 (1)    | 1.81 (7)    | 14 (1)   | 2.1 (6)  | 0.6 (3) | 19    | 10.3 (5)    | 13 (1)                  | 11 (1)                  | 33 (3) | 68    |
| 5     | 0.75                   | 160         | n.d.     | 3.02 (7) | 1.00 (7)    | 13.2 (9) | 1.9 (2)  | 0.5 (1) | 17    | 10.1 (2)    | 11.8 (2)                | 9.9 (4)                 | 34 (3) | 67    |
| 6     | 1.00                   | 160         | n.d.     | 3.5 (4)  | 0.61 (7)    | 11 (2)   | 1.2 (5)  | 1.5 (7) | 15    | 12.4 (6)    | 12.7 (5)                | 10 (2)                  | 34 (3) | 70    |
| 7     | 0.5                    | 140         | n.d.     | 4.4 (4)  | 2.5 (1)     | 11 (3)   | 1.0 (7)  | 0.5 (1) | 16    | 9.7 (1)     | 13.6 (9)                | 17 (2)                  | 31 (3) | 72    |
| 8     | 0.5                    | 150         | n.d.     | 3.3 (6)  | 2.1 (4)     | 15 (4)   | 2 (1)    | 0.5 (3) | 19    | 10 (1)      | 12 (2)                  | 13.4 (7)                | 32 (3) | 68    |
| 9     | 0.5                    | 170         | n.d.     | 3.0 (3)  | 1.31 (4)    | 18 (4)   | 4 (1)    | 1.3 (5) | 25    | 10 (1)      | 9.7 (3)                 | 9 (1)                   | 34 (3) | 63    |
| 10    | 0.5                    | 180         | n.d.     | 3.4 (7)  | 0.8 (4)     | 18 (3)   | 3.9 (9)  | 1.2 (3) | 24    | 10 (1)      | 9 (0)                   | 7.7 (4)                 | 32 (3) | 59    |

Reactions were performed in triplicate and employed the reaction conditions: 360 mg xylose (8.3 wt%), 4 g methanol, 0-360 mg Sn-Beta (HT, 150), 2 h, 600 rpm stirring. Standard deviations of the last digit are given in parenthesis. Compound abbreviations: 2,5-dihydroxy-4-methoxy-pentanoic acid methyl ester (DMPM), 3-deoxypentanolactone (DPL), *trans*-2,5-dihydroxy-3-pentenoic acid methyl ester (DPM), furanics (FUR), glycolaldehyde dimethyl acetal (GA-DMA), methyl glycosides (MG), methyl lactate (ML), methyl 4-methoxy-2-hydroxybutanoate (MMHB), methyl vinyl glycolate (MVG), 2,4,5-trihydroxy-3-pentanoic acid methyl ester (TPM) and xylose (XYL). n.d. = not detected.

[a] Combined yields (carbon%) of 2,4,5-trihydroxy-3-pentanoic acid methyl ester and 2,5-dihydroxy-4-methoxy-pentanoic acid methyl ester.

[b] Combined yields (carbon%) of furfural and furfural dimethyl acetal.

[c] Blank sample; contains no catalyst.

**Table S5.** Reaction yields from the conversion of xylose using Sn-Beta with addition of K<sub>2</sub>CO<sub>3</sub>.

| Entry | K <sub>2</sub> CO <sub>3</sub><br>mM | XYL<br>% | MG | Retro-Aldol |    |          |      |       | Dehydration        |     |       |
|-------|--------------------------------------|----------|----|-------------|----|----------|------|-------|--------------------|-----|-------|
|       |                                      |          |    | GA-DMA      | ML | MVG<br>% | MMHB | Total | FUR <sup>[a]</sup> | DPM | Total |
| 1     | 0.00                                 | n.d.     | 6  | 2           | 14 | 2        | <1   | 19    | 11                 | 33  | 54    |
| 2     | 0.05                                 | n.d.     | 1  | 2           | 27 | 7        | 2    | 38    | 9                  | 21  | 30    |
| 3     | 0.10                                 | n.d.     | 1  | 2           | 34 | 13       | 2    | 51    | 4                  | 14  | 28    |
| 4     | 0.15                                 | n.d.     | 1  | 2           | 34 | 14       | 2    | 52    | 6                  | 11  | 17    |
| 5     | 0.25                                 | n.d.     | 2  | 2           | 35 | 14       | 3    | 54    | 4                  | 8   | 12    |
| 6     | 0.50                                 | n.d.     | 5  | 1           | 29 | 13       | 2    | 45    | 2                  | 4   | 6     |
| 7     | 0.75                                 | n.d.     | 6  | 1           | 23 | 12       | 2    | 38    | 2                  | 2   | 4     |
| 8     | 1.00                                 | n.d.     | 5  | 1           | 16 | 9        | 2    | 28    | 1                  | 2   | 3     |

All reactions employed the reaction conditions: 360 mg xylose (8.3 wt%), 4 g methanol, 180 mg Sn-Beta (HT, 150), 2 h, 160 °C, 600 rpm stirring. Compound abbreviations: *trans*-2,5-dihydroxy-3-pentenoic acid methyl ester (DPM), furanics (FUR), glycolaldehyde dimethyl acetal (GA-DMA), methyl glycosides (MG), methyl lactate (ML), methyl 4-methoxy-2-hydroxybutanoate (MMHB), methyl vinyl glycolate (MVG) and xylose (XYL). n.d. = not detected, n.a. = not available.

[a] Combined yields (carbon%) of furfural and furfural dimethyl acetal.

**Table S6.** Enzymatic polymerization of E6-HH

| Polymer <sup>[a]</sup> | Temperature<br>°C | M <sub>n</sub> <sup>[b]</sup><br>g mol <sup>-1</sup> | M <sub>w</sub> <sup>[b]</sup><br>g mol <sup>-1</sup> | PDI <sup>[b]</sup> |
|------------------------|-------------------|------------------------------------------------------|------------------------------------------------------|--------------------|
| I-1                    | 50                | 1816                                                 | 3874                                                 | 2.1                |
| I-2                    | 60                | 3616                                                 | 4701                                                 | 1.3                |
| I-3                    | 70                | 4688                                                 | 5905                                                 | 1.3                |
| I-4                    | 80                | 5421                                                 | 6878                                                 | 1.3                |

[a] All reactions were conducted at 200 mbar for 18 h.

[b] Determined by SEC in THF.
